# Supplementary material
Source: PubMed Central journal article supplement (PMC5465475)
Supplement: 10.1074_M116.772442_jbc.M116.772442-1.pdf [file 10.1074_M116.772442_jbc.M116.772442-1.pdf]

**Determination of dendritic spine morphology by the striatin scaffold protein STRN4 through interaction with the phosphatase PP2A**

Lianfeng Lin, Louisa Hoi-Ying Lo, Quanwei Lyu, and Kwok-On Lai

**Supplementary Information**

Additional analyses of dendritic spine morphology were performed using different cut-off ratios of head diameter to neck diameter (H/N) and length to neck diameter (L/N) for defining mushroom spines and thin spines (see Fig. S1, S3, S4 and S5). Example of images acquired by confocal microscopy and Super-resolution Structured Illumination Microscopy (SR-SIM) to illustrate the higher resolution of SR-SIM to resolve the fine structure of dendritic spine (see Fig. S2).

Figure S1

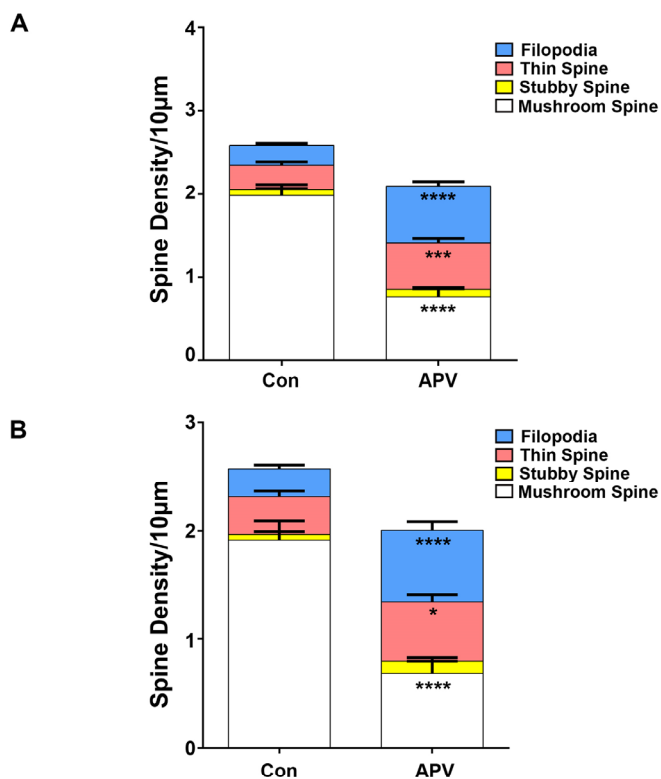

### Figure S1. Effect of APV on spine morphology

Data from Fig 3A were analyzed using different head diameter to neck diameter (H/N) ratio and length to neck diameter (L/N) ratio. *A*, Mushroom spine was defined as the ratio of  $H/N \geq 1.7$ ; thin spine had the ratio of  $1 \leq H/N < 1.7$  and  $1.7 \leq L/N \leq 3$ . *B*, Mushroom spine was defined as the ratio of  $H/N \geq 2$ ; thin spine had the ratio of  $1 \leq H/N < 2$  and  $2 \leq L/N \leq 3$ . Filopodia and stubby spine were defined using the same ratios as in Fig. 3A. Results were pooled from two experiments; 35 dendrites from 17 neurons were quantified for each condition. Data are mean  $\pm$  SEM; \* $p < 0.05$ ; \*\*\* $p < 0.001$ ; \*\*\*\* $p < 0.0001$ ; Student's *t*-test.

**Figure S2**

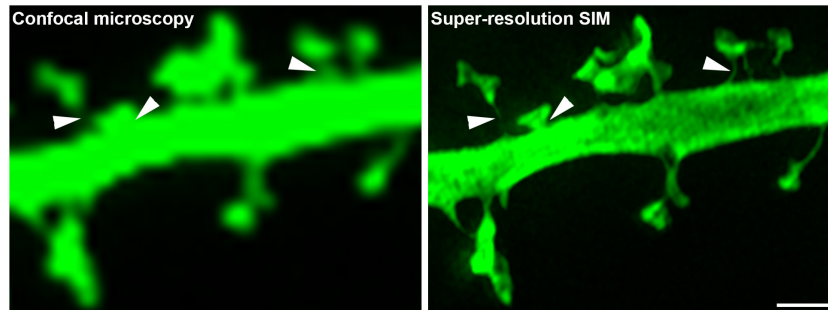

**Figure S2. Super-resolution SIM imaging reveals the structure of dendritic spines more clearly.** The same dendritic segment of a neuron expressing GFP was imaged by confocal microscopy (A) and Super-resolution SIM (B), respectively. Spine necks that appeared indistinct in the confocal image (arrowheads) were better visualized by SIM. Scale bar: 1  $\mu$ m.

Figure S3

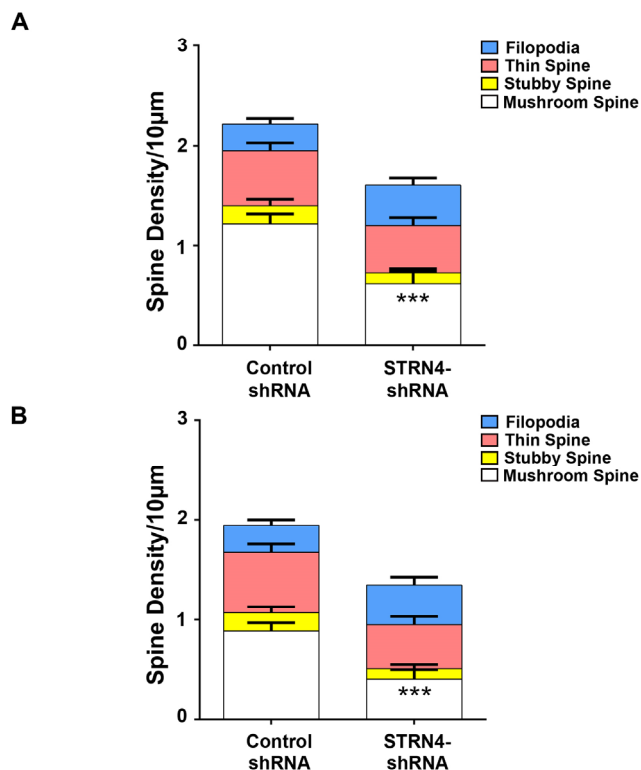

**Figure S3. Effect of STRN4 knockdown on spine morphology**

Data from Fig 5B were analyzed using different head diameter to neck diameter (H/N) ratio and length to neck diameter (L/N) ratio. *A*, Mushroom spine was defined as the ratio of  $H/N \geq 1.7$ ; thin spine had the ratio of  $1 \leq H/N < 1.7$  and  $1.7 \leq L/N \leq 3$ . *B*, Mushroom spine was defined as the ratio of  $H/N \geq 2$ ; thin spine had the ratio of  $1 \leq H/N < 2$  and  $2 \leq L/N \leq 3$ . Filopodia and stubby spine were defined using the same ratios as in main text (15-16 dendrites from 6 neurons were quantified for each condition; mean  $\pm$  SEM; \*\*\* $p < 0.001$ , Student's *t*-test).

Figure S4

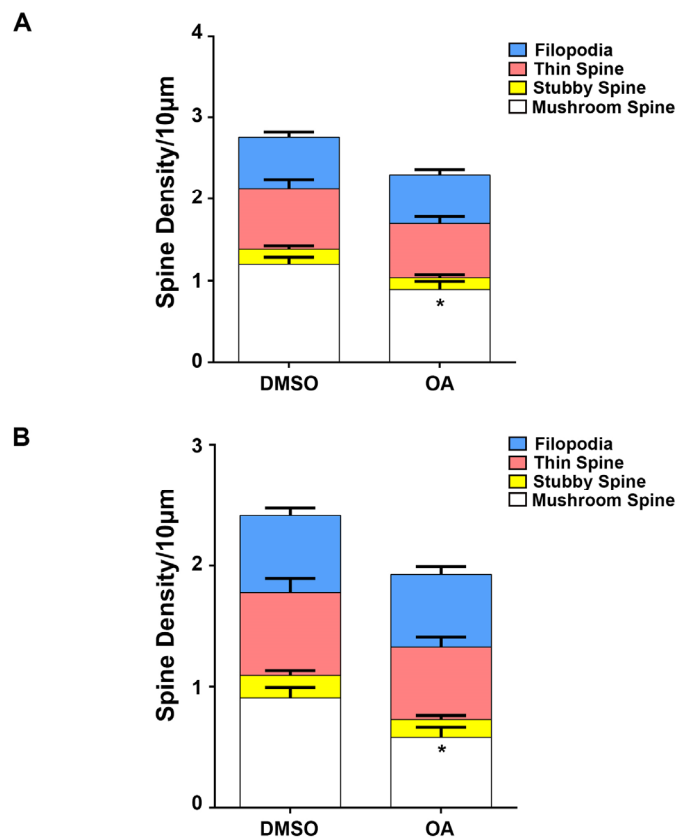

**Figure S4. Effect of PP2A inhibition on spine morphology.**

Data from Fig 6B were analyzed using different head diameter to neck diameter (H/N) ratio and length to neck diameter (L/N) ratio. A, Mushroom spine was defined as the ratio of  $H/N \geq 1.7$ ; thin spine had the ratio of  $1 \leq H/N < 1.7$  and  $1.7 \leq L/N \leq 3$ . B, Mushroom spine was defined as the ratio of  $H/N \geq 2$ ; thin spine had the ratio of  $1 \leq H/N < 2$  and  $2 \leq L/N \leq 3$ . Filopodia and stubby spine were defined using the same ratios as in main text. 15 dendrites from 9 neurons in each group were quantified. Data are mean  $\pm$  SEM; \* $p < 0.05$ , Student's *t*-test.

Figure S5

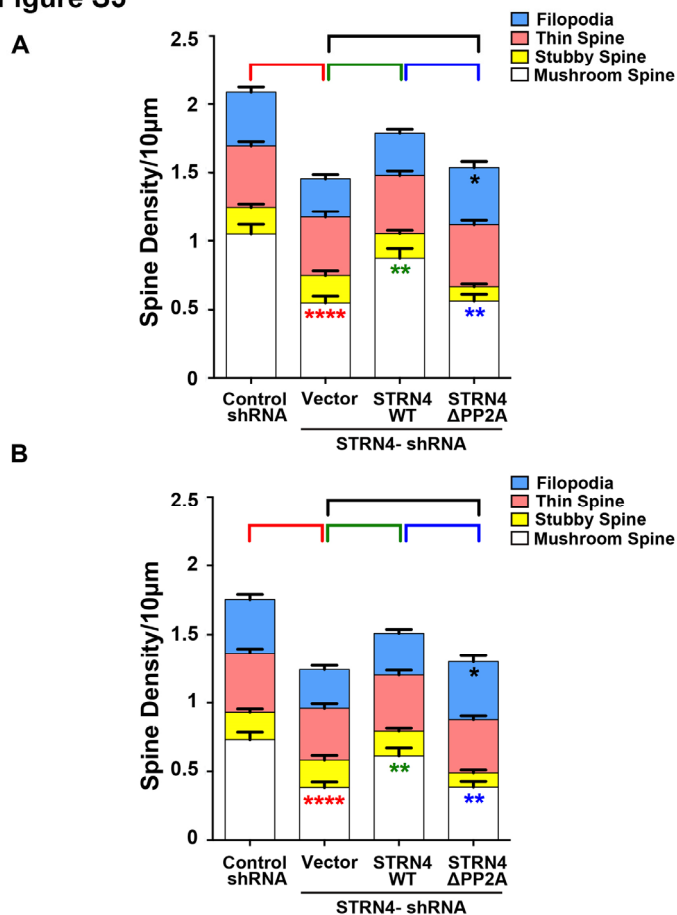

**Figure S5. STRN4 regulates spine morphology through interaction with PP2A.**

Data from Fig 7B were analyzed using different head diameter to neck diameter (H/N) ratio and length to neck diameter (L/N) ratio. *A*, Mushroom spine was defined as the ratio of  $H/N \geq 1.7$ ; thin spine had the ratio of  $1 \leq H/N < 1.7$  and  $1.7 \leq L/N \leq 3$ . *B*, Mushroom spine was defined as the ratio of  $H/N \geq 2$ ; thin spine had the ratio of  $1 \leq H/N < 2$  and  $2 \leq L/N \leq 3$ . Filopodia and stubby spine were defined using the same ratios as in main text. Results were pooled from three independent experiments (71-79 dendrites in total from 33-39 neurons in each group). Data are mean  $\pm$  SEM; \* $p < 0.05$ ; \*\* $p < 0.01$ ; \*\*\* $p < 0.0001$ ; One-way ANOVA, Tukey's multiple comparisons test.
